# Supplementary material for: One-pot synthesis of halogen exchanged silsesquioxanes: octakis(3-bromopropyl)octasilsesquioxane and octakis(3-iodopropyl)octasilsesquioxane
Source: Royal Society of Chemistry journal article supplement (doi:10.1039/c3dt51373d), 2013-01-01
Supplement: c3dt51373d.pdf [file c3dt51373d.pdf]

# Supporting Information

## One-pot synthesis of Halogen exchange silsesquioxanes: Octakis(3-bromopropyl)octasilsesquioxane and Octakis(3-iodopropyl)octasilsesquioxane

Vuthichai Ervithayasuporn,<sup>\*a,b</sup> Nuttawut Pornsamutsin,<sup>a</sup> Pratthana Prangyoo,<sup>a</sup> Kasinpoj Sammawutthichai,<sup>a</sup> Thapakorn Jaroentomeechai,<sup>a</sup> Chuttree Phurat,<sup>c</sup> and Thapong Teerawatananond<sup>c</sup>

<sup>a</sup> Department of Chemistry and Center of Excellence for Innovation in Chemistry (PERCH-CIC) and Faculty of Science, Mahidol University, Rama VI road, Ratchathewi, Bangkok 10400, Thailand.

<sup>b</sup> Capability Building Unit for Nanoscience and Nanotechnology, Faculty of Science, Mahidol University, Rama VI road, Ratchathewi, Bangkok 10400, Thailand.

<sup>c</sup> Biomaterials and Bioorganic Chemistry Research group, Department of Chemistry, Faculty of Science, Chulalongkorn University, Phayathai road, Pathumwan, Bangkok 10330, Thailand

\*Corresponding author: V. Ervithayasuporn

Email: [vuthichai.erv@mahidol.ac.th](mailto:vuthichai.erv@mahidol.ac.th)

Tel: +66-2-201-5126, Fax: +66-2-354-7151

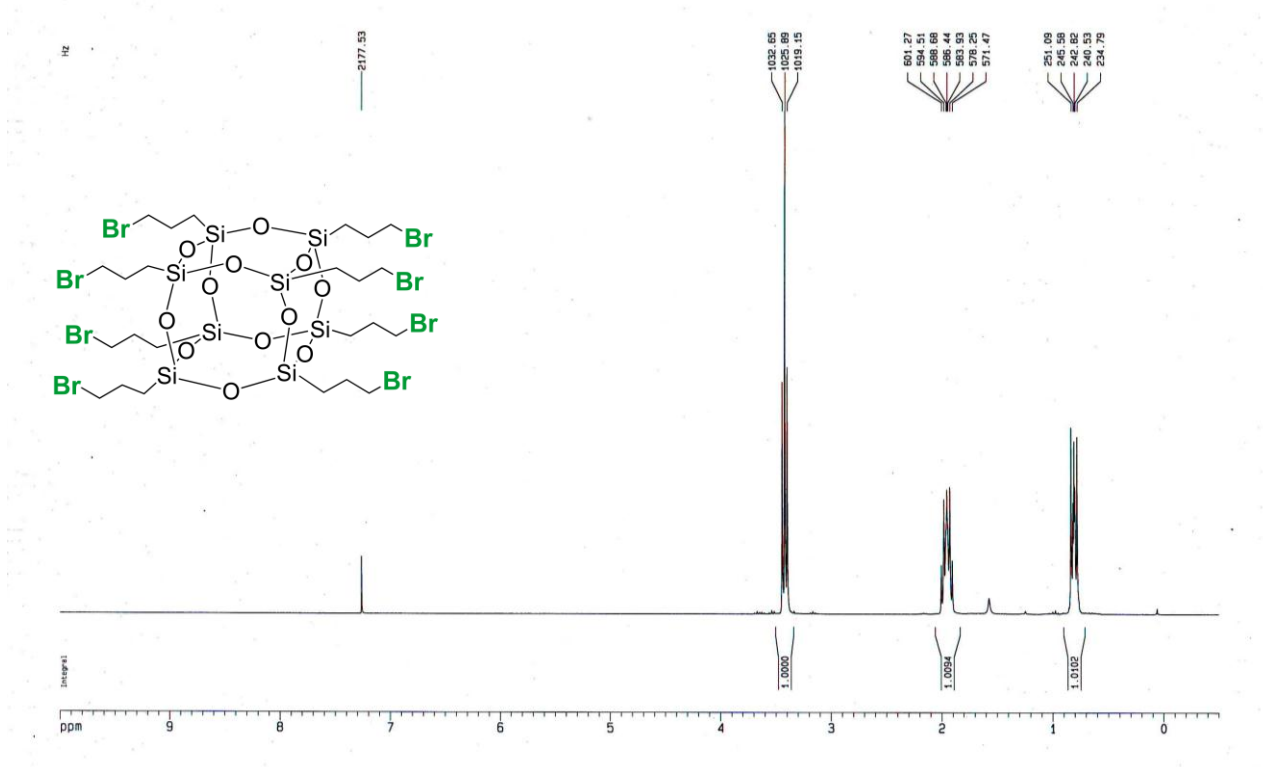

**Figure 1:**  $^1\text{H}$ -NMR (300 MHz) of compound **2** in  $\text{CDCl}_3$

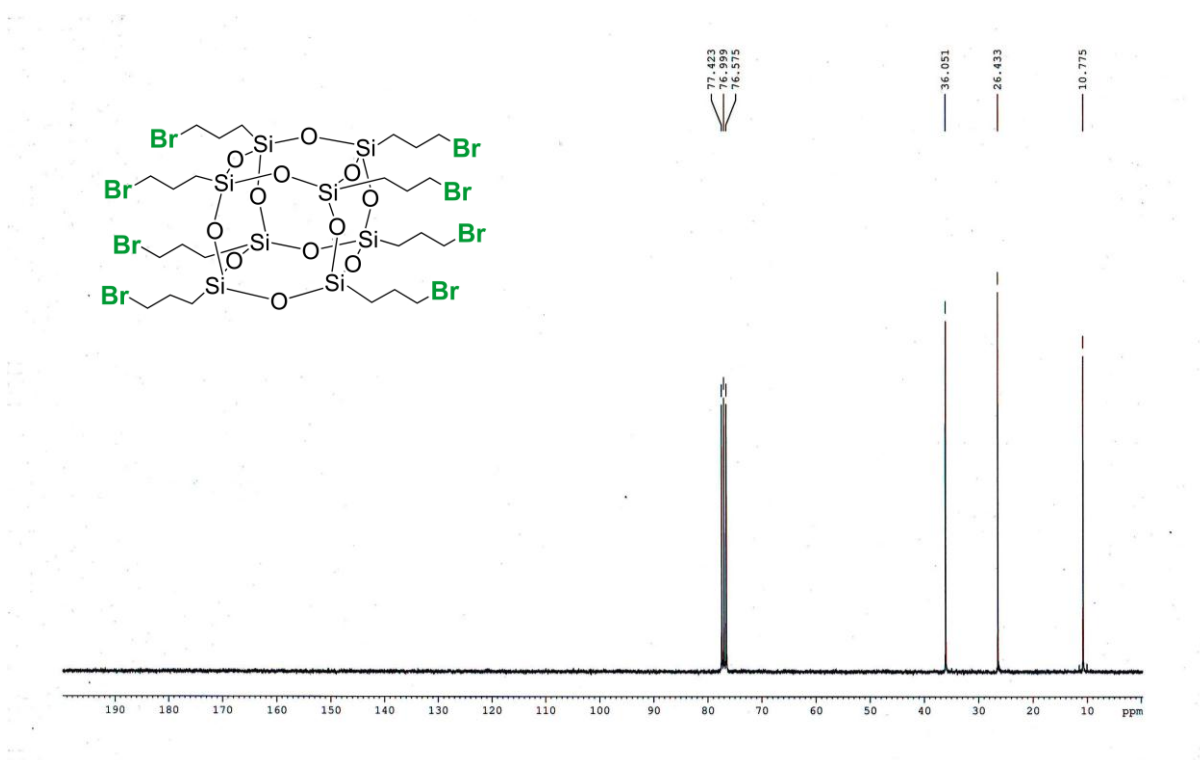

**Figure 2:**  $^{13}\text{C}\{^1\text{H}\}$ -NMR (300 MHz) of compound **2** in  $\text{CDCl}_3$

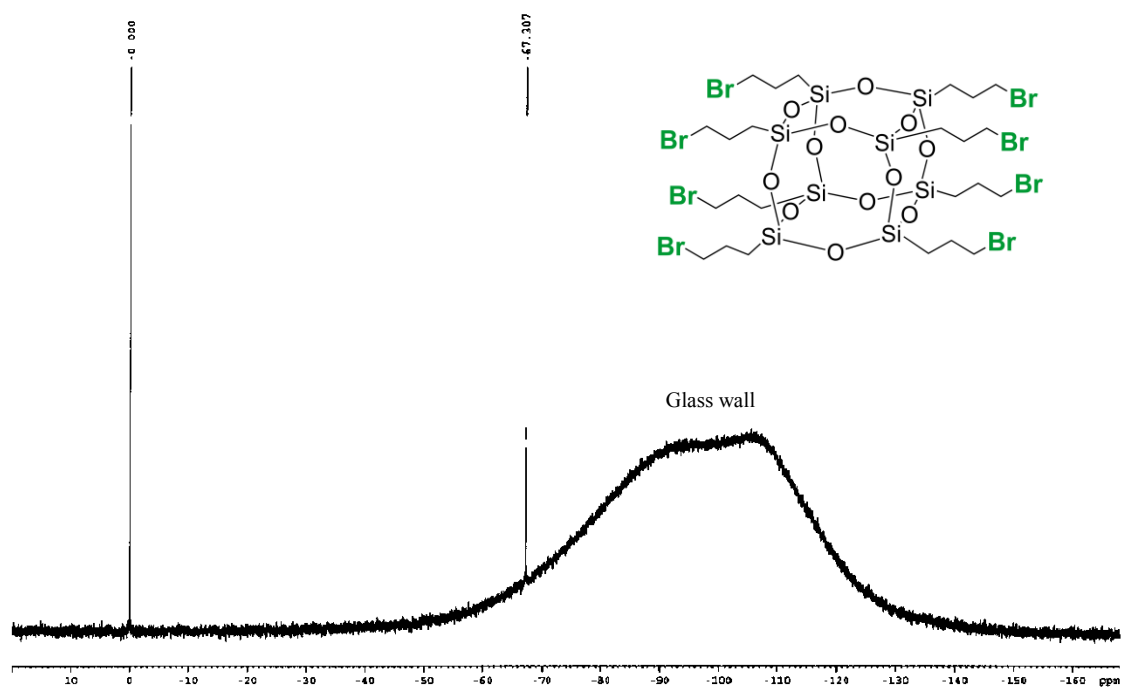

**Figure 3:**  $^{29}\text{Si}\{^1\text{H}\}$ -NMR (500 MHz) of compound **2** in  $\text{CDCl}_3$

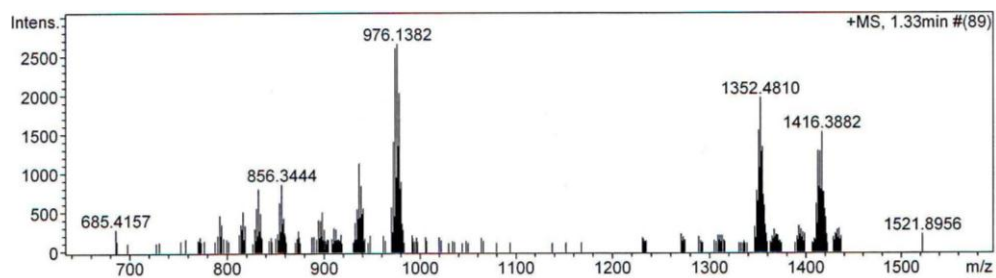

| #  | m/z       | I    | I %   | S/N | FWHM   | Res.  |
|----|-----------|------|-------|-----|--------|-------|
| 1  | 832.3116  | 801  | 30.2  |     | 0.0745 | 11174 |
| 2  | 854.3351  | 619  | 23.3  |     | 0.0730 | 11696 |
| 3  | 856.3444  | 854  | 32.2  |     | 0.0804 | 10653 |
| 4  | 936.2634  | 1125 | 42.4  |     | 0.0863 | 10850 |
| 5  | 938.2626  | 834  | 31.4  |     | 0.0934 | 10046 |
| 6  | 972.1411  | 1402 | 52.9  |     | 0.0972 | 10000 |
| 7  | 974.1409  | 2597 | 97.9  |     | 0.0997 | 9774  |
| 8  | 975.1384  | 945  | 35.6  |     | 0.1015 | 9605  |
| 9  | 976.1382  | 2652 | 100.0 |     | 0.0925 | 10557 |
| 10 | 977.1401  | 1345 | 50.7  |     | 0.0856 | 11416 |
| 11 | 978.1334  | 2028 | 76.5  |     | 0.0896 | 10916 |
| 12 | 979.1357  | 797  | 30.1  |     | 0.0977 | 10021 |
| 13 | 980.1328  | 887  | 33.4  |     | 0.1007 | 9729  |
| 14 | 1348.4792 | 774  | 29.2  |     | 0.1559 | 8649  |
| 15 | 1349.4838 | 638  | 24.1  |     | 0.1142 | 11817 |
| 16 | 1350.4728 | 1550 | 58.4  |     | 0.1318 | 10250 |
| 17 | 1351.4725 | 1065 | 40.2  |     | 0.1224 | 11040 |
| 18 | 1352.4810 | 1967 | 74.2  |     | 0.1113 | 12153 |
| 19 | 1353.4900 | 1272 | 48.0  |     | 0.1054 | 12839 |
| 20 | 1354.4720 | 1332 | 50.2  |     | 0.1241 | 10918 |
| 21 | 1355.4747 | 720  | 27.1  |     | 0.1257 | 10784 |
| 22 | 1356.4780 | 579  | 21.8  |     | 0.1418 | 9567  |
| 23 | 1410.4004 | 605  | 22.8  |     | 0.1298 | 10865 |
| 24 | 1412.3805 | 1285 | 48.5  |     | 0.1194 | 11834 |
| 25 | 1413.3868 | 821  | 31.0  |     | 0.1223 | 11553 |
| 26 | 1414.3911 | 1280 | 48.3  |     | 0.1535 | 9216  |
| 27 | 1415.3887 | 789  | 29.8  |     | 0.1434 | 9868  |
| 28 | 1416.3882 | 1525 | 57.5  |     | 0.1340 | 10566 |
| 29 | 1417.3892 | 760  | 28.7  |     | 0.1323 | 10712 |
| 30 | 1418.3834 | 754  | 28.4  |     | 0.1446 | 9810  |

**Figure 4:** HRMS (ESI) of compound **2**

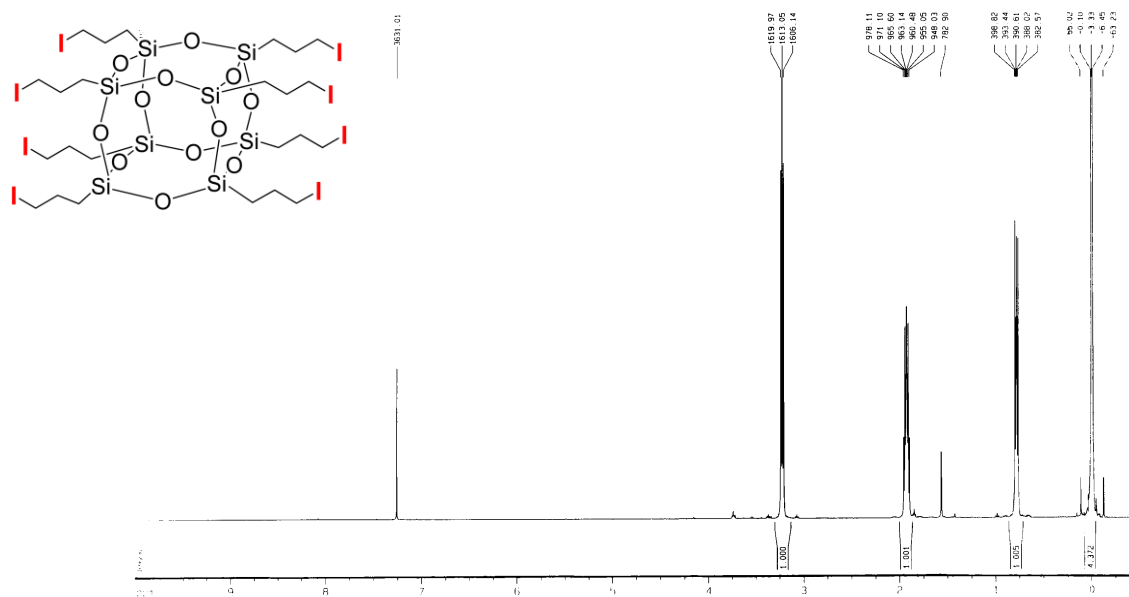

**Figure 5:** <sup>1</sup>H-NMR (500 MHz) of compound **3** in CDCl<sub>3</sub>

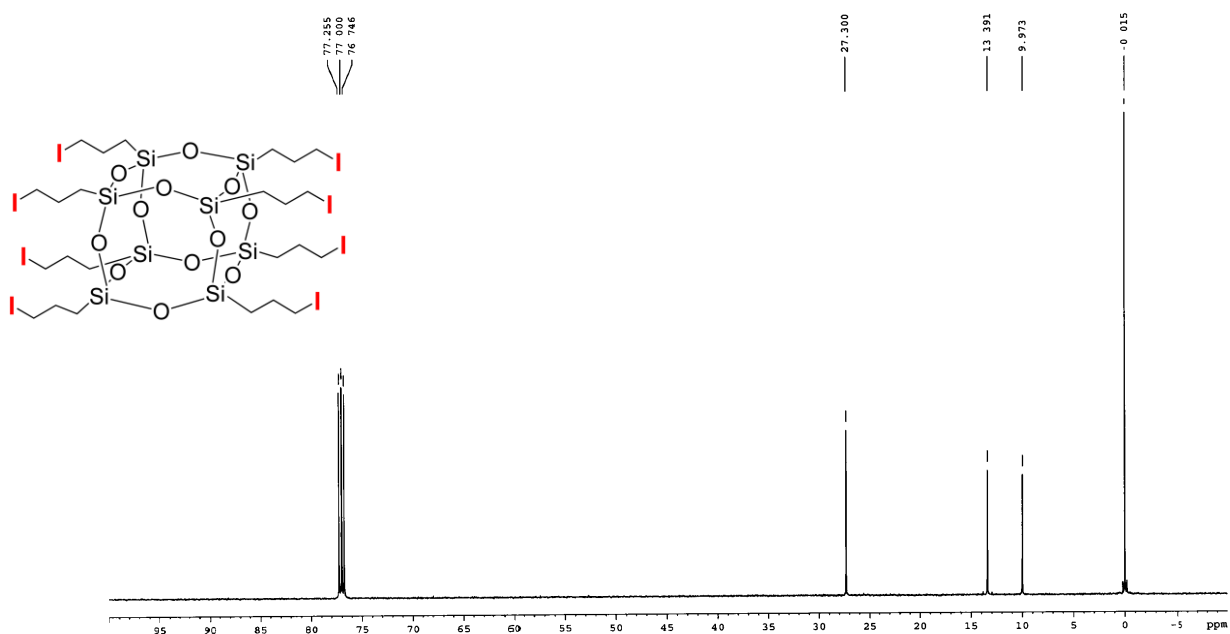

**Figure 6:** <sup>13</sup>C{<sup>1</sup>H}-NMR (500 MHz) of compound **3** in CDCl<sub>3</sub>

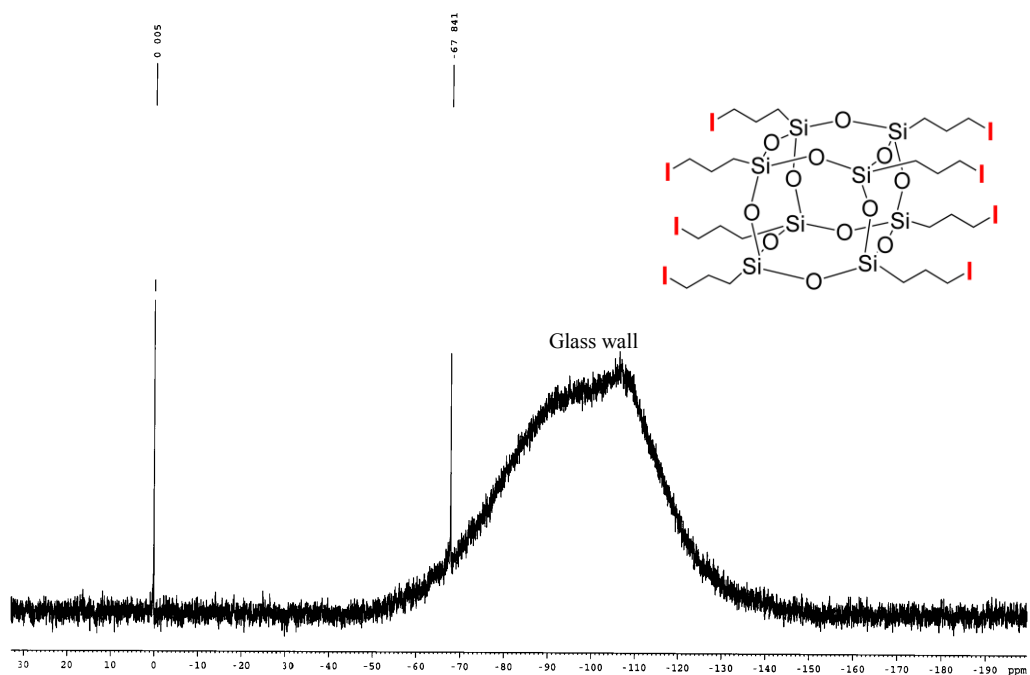

**Figure 7:**  $^{29}\text{Si}\{^1\text{H}\}$ -NMR (500 MHz) of compound **3** in  $\text{CDCl}_3$

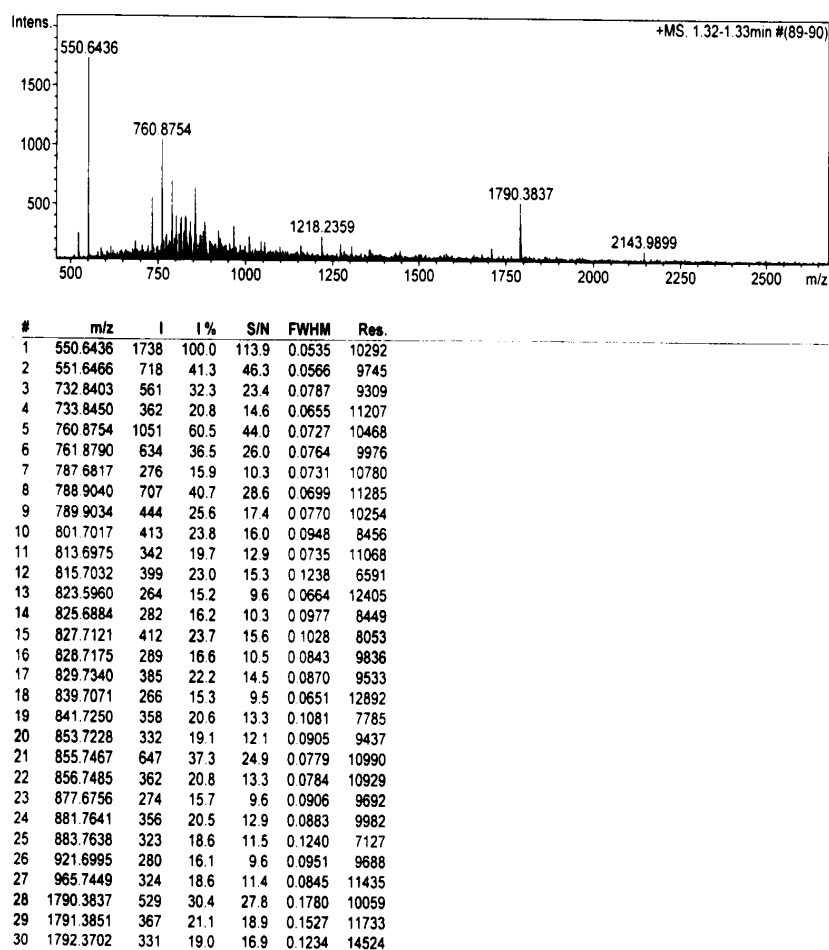

**Figure 8:** HRMS (ESI) of compound **3**
